# Supplementary material for: Overexpression of the Apple (Malus × domestica) MdERF100 in Arabidopsis Increases Resistance to Powdery Mildew
Source: MDPI journal article supplement (doi:10.3390/ijms22115713), 2021-05-27
Supplement: s1 [file s1]

## Supplementary Materials

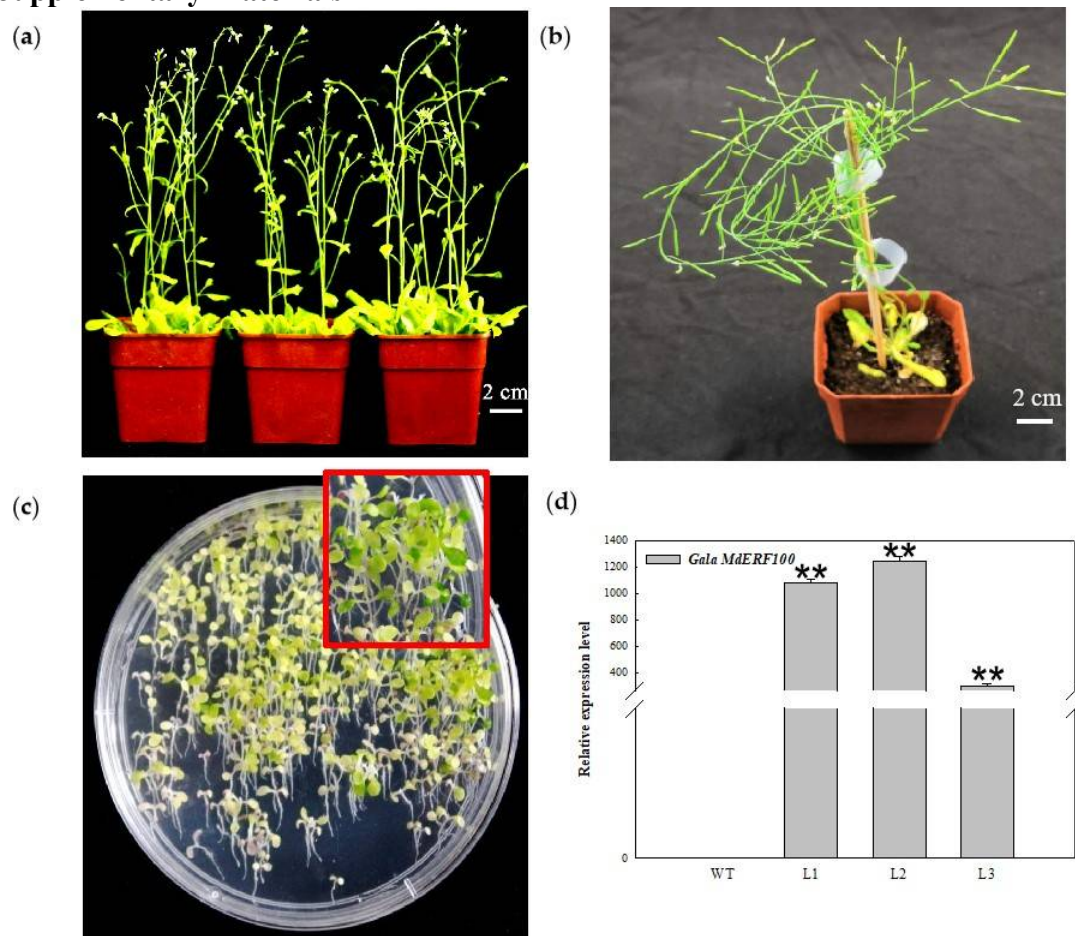

Figure S1: The selection of *Arabidopsis* lines overexpressing *MdERF100* and relative transcription level of *MdERF100*

## Supplementary Table S1. qRT-PCR system

| Ingredient                   | Volume (μL) |
|------------------------------|-------------|
| 2×ChamQ SYBR qPCR Master Mix | 10.0        |
| Primer1                      | 0.4         |
| Primer2                      | 0.4         |
| 50×ROX reference Dye 1       | 0.4         |
| cDNA                         | 1.0         |
| ddH <sub>2</sub> O           | 7.8         |
| Total                        | 20.0        |

## Supplementary Table S2. Related primers sequence designed in this experiment.

| Name                   | Forward (F) and Reverse (R) primer sequence (5'-3') | Purpose    |
|------------------------|-----------------------------------------------------|------------|
| GC- <i>MdERF100</i> -F | ATGTACGGACAGAGTGGAGCTGACT                           | Gene clone |
| GC- <i>MdERF100</i> -R | TCAGACCACCAATAACTGCTCGCCA                           |            |

| GC- <i>MdbHLH92</i> -F               | ATGGACCAATATATCCTCAAAGCAT                                |                 |
|--------------------------------------|----------------------------------------------------------|-----------------|
| GC- <i>MdbHLH92</i> -R               | TCACCTTCCTGGAAATGAAAAACGC                                |                 |
| qRT- <i>MdERF100</i> -F              | TGTTCTACGGCTTTTCGGT                                      | qRT-PCR         |
| qRT- <i>MdERF100</i> -R              | TGTAATGCTTCCCCCTTCGCT                                    |                 |
| qRT- <i>MdbHLH92</i> -F              | AAATGAAGCCGAACCAGAC                                      |                 |
| qRT- <i>MdbHLH92</i> -R              | TGATGTAGGATTAGCCACC                                      |                 |
| qRT- <i>MdTubulin</i> -F             | AGGATGCTACAGCCGATGAG                                     |                 |
| qRT- <i>MdTubulin</i> -R             | GCCGAAGAACTGACGAGAATC                                    |                 |
| qRT- <i>AtNPR1</i> -F                | GCTCTGCTCGTCAATGGTTATC                                   |                 |
| qRT- <i>AtNPR1</i> -R                | GAGGAGTCGGTGTTATCGGTA                                    |                 |
| qRT- <i>AtPR2</i> -F                 | CGGTACATCAACGTTGGAA                                      |                 |
| qRT- <i>AtPR2</i> -R                 | GCGTAGTCTAGATGGATGTT                                     |                 |
| qRT- <i>AtPR3</i> -F                 | CGCTTGCTCTGCTAGAGGTT                                     |                 |
| qRT- <i>AtPR3</i> -R                 | GCTCGGTTACAGTAGTCTGA                                     |                 |
| qRT- <i>AtPDF1.2</i> -F              | TCATGGCTAAGTTTGCTTCC                                     |                 |
| qRT- <i>AtPDF1.2</i> -R              | AATACACACGATTTAGCACC                                     |                 |
| qRT- <i>AtEDS1</i> -F                | TCATACGCAATCCAAATGTTTAC                                  |                 |
| qRT- <i>AtEDS1</i> -R                | AAAAACCTCTCTTGCTCGATCAC                                  |                 |
| qRT- <i>AtPR5</i> -F                 | GCACAGAGACACACACAAAA                                     |                 |
| qRT- <i>AtPR5</i> -R                 | TGTTCTTAGAGTGAAGTCTG                                     |                 |
| Name                                 | Forward (F) and Reverse (R) primer sequence (5'-3')      | Purpose         |
| qRT- <i>AtActin1</i> -F              | TCAATCCAGGAGATGTTTAGG                                    |                 |
| qRT- <i>AtActin1</i> -R              | ACTGCTGGTACTCTGCGACA                                     |                 |
| <i>MdERF100</i> -GFP-F- <i>KpnI</i>  | acgggggacgagctc <u>ggtacc</u> ATGTACGGACAGAGTGGAGCTGACT  | pCAMBIA2300-GFP |
| <i>MdERF100</i> -GFP-R- <i>BamHI</i> | ggtgtcgactctagag <u>gatcc</u> TCAGACCACCAATAACTGCTCGCCA  |                 |
| <i>MdbHLH92</i> -GFP-F- <i>KpnI</i>  | acgggggacgagctc <u>ggtacc</u> ATGGACCAATATATCCTCAAAGCAT  |                 |
| <i>MdbHLH92</i> -GFP-R- <i>BamHI</i> | ggtgtcgactctagag <u>gatcc</u> TCACCTTCCTGGAAATGAAAAACGC  |                 |
| <i>MdERF100</i> -BD-F- <i>EcoRI</i>  | atggccatggaggcc <u>gaattc</u> ATGTACGGACAGAGTGGAGCTGACT  | pGBKT7          |
| <i>MdERF100</i> -BD-R- <i>BamHI</i>  | ccgctgcaggtcgac <u>ggaattc</u> TCAGACCACCAATAACTGCTCGCCA |                 |
| <i>MdbHLH92</i> -BD-F- <i>EcoRI</i>  | atggccatggaggcc <u>gaattc</u> ATGGACCAATATATCCTCAAAGCCT  |                 |
| <i>MdbHLH92</i> -BD-R- <i>BamHI</i>  | ccgctgcaggtcgac <u>ggaattc</u> CTACCTTCCTGGAAATGAAAAACGC |                 |
| <i>MdCSC1</i> -AD-F- <i>EcoRI</i>    | gccatggaggccagt <u>gaattc</u> ATGGCGACTCTGGGTGACATTGGGG  | pGADT7          |
| <i>MdCSC1</i> -AD-R- <i>BamHI</i>    | cagctcgagctcgat <u>ggaattc</u> TCAATGATCTTCGTTGTGGTAGGCA |                 |
| <i>MdBIP</i> -AD-F- <i>EcoRI</i>     | gccatggaggccagt <u>gaattc</u> ATGGCTGGCTCTTGAGAGCTCGCG   |                 |
| <i>MdBIP</i> -AD-R- <i>BamHI</i>     | cagctcgagctcgat <u>ggaattc</u> TTAAAGCTCGTCATGCGACTCATCG |                 |

|                                     |                                                          |        |
|-------------------------------------|----------------------------------------------------------|--------|
| <i>MdbHLH92</i> -AD-F- <i>EcoRI</i> | gccatggaggccagtg <u>gaattc</u> ATGGACCAATATATCCTCAAAGCAT |        |
| <i>MdbHLH92</i> -AD-R- <i>BamHI</i> | cagctcgagctcgatg <u>ggatcc</u> TCACCTTCCTGGAAATGGAAAACGC |        |
| <i>MdPAEI</i> -AD-F- <i>EcoRI</i>   | gccatggaggccagtg <u>gaattc</u> ATGTTTCTCACAAGGACTGAGTATG |        |
| <i>MdPAEI</i> -AD-R- <i>BamHI</i>   | cagctcgagctcgatg <u>ggatcc</u> TTATAGGCGAGCAATGACGGCCTCC |        |
| <i>MdUBQ</i> -AD-F- <i>EcoRI</i>    | gccatggaggccagtg <u>gaattc</u> ATGGCCATGTATATCCGTGTTAAGC |        |
| <i>MdUBQ</i> -AD-R- <i>BamHI</i>    | cagctcgagctcgatg <u>ggatcc</u> TCACCAATTGCCTGCATCTGCATCA |        |
| <i>MdbHLH92</i> -NE-F- <i>XhoI</i>  | agtggatccgtcgac <u>ctcgag</u> ATGGACCAATATATCCTCAAAGCAT  | pUC-NE |
| <i>MdbHLH92</i> -NE-R- <i>KpnI</i>  | ctcctacccgggagcg <u>gtacc</u> TCACCTTCCTGGAAATGGAAAACGC  |        |
| <i>MdERF100</i> -NE-F- <i>XhoI</i>  | agtggatccgtcgac <u>ctcgag</u> ATGTACGGACAGAGTGGAGCTGACT  |        |
| <i>MdERF100</i> -NE-R- <i>KpnI</i>  | ctcctacccgggagcg <u>gtacc</u> TCAGACCACCAATAACTGCTCGCCA  |        |
| <i>MdERF100</i> -CE-F- <i>XhoI</i>  | gggactctagaggat <u>ctcgag</u> ATGTACGGACAGAGTGGAGCTGACT  | pUC-CE |
| <i>MdERF100</i> -CE-R- <i>KpnI</i>  | atcgatgggtacatg <u>gtacc</u> GACCACCAATAACTGCTCGCCACGT   |        |
| <i>MdbHLH92</i> -CE-F- <i>XhoI</i>  | agtggatccgtcgac <u>ctcgag</u> ATGGACCAATATATCCTCAAAGCCT  |        |
| <i>MdbHLH92</i> -CE-R- <i>KpnI</i>  | ctcctacccgggagcg <u>gtacc</u> CCTTCCTGGAAATGGAAAACGCAGT  |        |

---
